# Supplementary material for: Li3[Al(PO4)2(H2O)1.5] and Na[AlP2O7]: from 2D layered polar to 3D centrosymmetric framework structures
Source: Royal Society of Chemistry journal article supplement (doi:10.1039/d2ce00994c), 2022-01-01
Supplement: d2ce00994c1.pdf [file d2ce00994c1.pdf]

## Supporting Information

### $\text{Li}_3[\text{Al}(\text{PO}_4)_2(\text{H}_2\text{O})_{1.5}]$ and $\text{Na}[\text{AlP}_2\text{O}_7]$ from 2D Layered Polar to 3D Centrosymmetric Framework Structures

#### Contents

**Figure S1:** EDX and SEM images of  $\text{Li}_3[\text{Al}(\text{PO}_4)_2(\text{H}_2\text{O})_{1.5}]$ .

**Figure S2:** EDX and SEM images of  $\text{Na}[\text{AlP}_2\text{O}_7]$ .

**Figure S3:** Experimental (black) and simulated (red) PXRD of  $\text{Li}_3[\text{Al}(\text{PO}_4)_2(\text{H}_2\text{O})_{1.5}]$  (a) and  $\text{Na}[\text{AlP}_2\text{O}_7]$  (b).

**Table S1.** Important Bond Lengths (angstroms) and Important Bond angles (degrees) for  $\text{Li}_3[\text{Al}(\text{PO}_4)_2(\text{H}_2\text{O})_{1.5}]$  (a) and  $\text{Na}[\text{AlP}_2\text{O}_7]$  (b).

**Figure S4:**(a) The simplified cationic 2D Layer of  $\text{Li}_3[\text{Al}(\text{PO}_4)_2(\text{H}_2\text{O})_{1.5}]$  along the *c*-axis (a); two 8-MRs along the *c*-axis with a size of  $\sim 5.474 \text{ \AA} \times 5.383 \text{ \AA}$  (b), and  $\sim 5.785 \text{ \AA} \times 5.785 \text{ \AA}$  (c).

**Figure S5:** TG-DSC curves of  $\text{Li}_3[\text{Al}(\text{PO}_4)_2(\text{H}_2\text{O})_{1.5}]$  (a) and  $\text{Na}[\text{AlP}_2\text{O}_7]$  (b).

**Figure S6:** IR spectra of  $\text{Li}_3[\text{Al}(\text{PO}_4)_2(\text{H}_2\text{O})_{1.5}]$  (a) and  $\text{Na}[\text{AlP}_2\text{O}_7]$  (b).

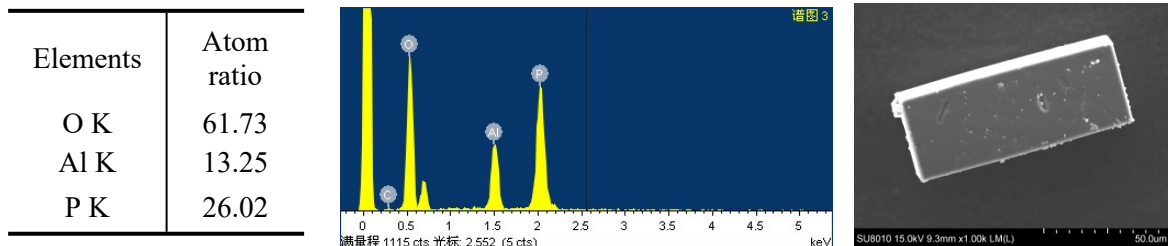

**Figure S1:** EDX and SEM image of  $\text{Li}_3[\text{Al}(\text{PO}_4)_2(\text{H}_2\text{O})_{1.5}]$ .

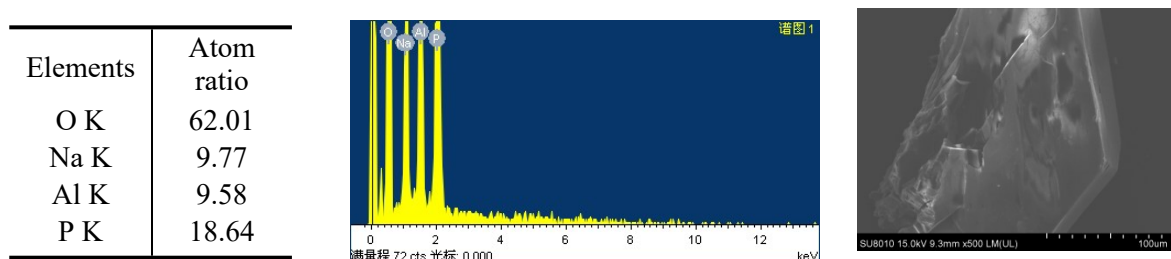

**Figure S2:** EDX and SEM image of  $\text{Na}[\text{AlP}_2\text{O}_7]$ .

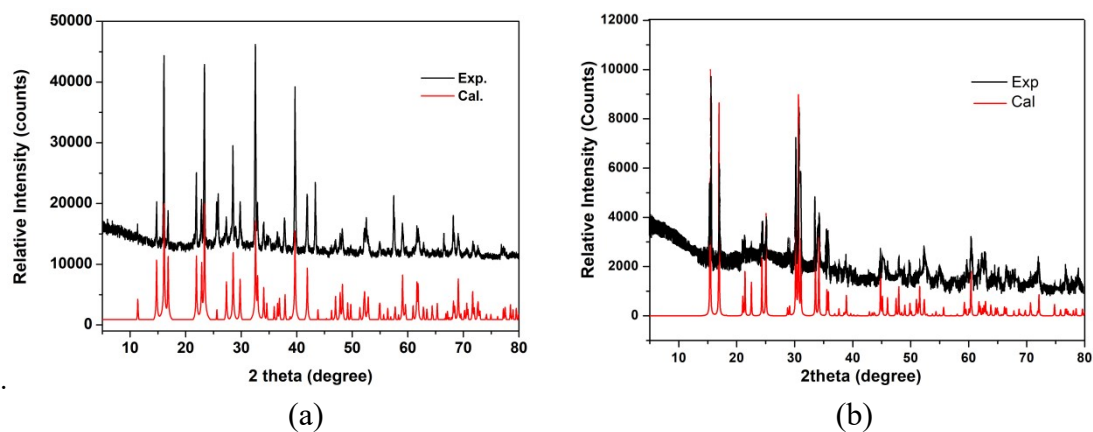

**Figure S3:** Experimental (black) and simulated (red) PXRD of  $\text{Li}_3[\text{Al}(\text{PO}_4)_2(\text{H}_2\text{O})_{1.5}]$  (a) and  $\text{Na}[\text{AlP}_2\text{O}_7]$  (b).

**Table S1. Important Bond Lengths (angstroms) and Important Bond angles (degrees) for  $\text{Li}_3[\text{Al}(\text{PO}_4)_2(\text{H}_2\text{O})_{1.5}]$  and  $\text{Na}[\text{AlP}_2\text{O}_7]$ .**

| $\text{Li}_3[\text{Al}(\text{PO}_4)_2(\text{H}_2\text{O})_{1.5}]$ |           | $\text{Na}[\text{AlP}_2\text{O}_7]$ |           |
|-------------------------------------------------------------------|-----------|-------------------------------------|-----------|
| Al(1)-O(2)                                                        | 1.790(8)  | P(1)-O(3)                           | 1.505(4)  |
| Al(1)-O(3)                                                        | 1.819(7)  | P(1)-O(1)                           | 1.516(4)  |
| Al(1)-O(1)#1                                                      | 1.874(9)  | P(1)-O(2)                           | 1.521(3)  |
| Al(1)-O(5)#2                                                      | 1.889(8)  | P(1)-O(4)                           | 1.525(13) |
| Al(1)-O(4)                                                        | 1.901(10) | Al(1)-O(3)#1                        | 1.880(4)  |
| Al(1)-O(7)#3                                                      | 1.896(8)  | Al(1)-O(3)#2                        | 1.880(4)  |
| P(1A)-O(6)                                                        | 1.504(12) | Al(1)-O(2)#3                        | 1.893(4)  |
| P(1A)-O(4)                                                        | 1.519(7)  | Al(1)-O(2)#4                        | 1.893(4)  |
| P(1A)-O(7)                                                        | 1.545(11) | Al(1)-O(1)                          | 1.913(4)  |
| P(1A)-O(9)                                                        | 1.603(16) | Al(1)-O(1)#5                        | 1.913(4)  |
| P(1A)-O(11)                                                       | 2.25(7)   | Na(1)-O(2)                          | 2.250(4)  |
| P(1B)-O(11)                                                       | 1.48(7)   | Na(1)-O(2)#8                        | 2.250(4)  |
| P(1B)-O(4)                                                        | 1.487(8)  | Na(1)-O(1)#9                        | 2.535(4)  |
| P(1B)-O(6)                                                        | 1.482(13) | Na(1)-O(1)#6                        | 2.535(4)  |
| P(1B)-O(7)                                                        | 1.574(11) | Na(1)-O(4)#10                       | 2.796(13) |
| Li(1)-O(1)                                                        | 2.15(4)   | Na(1)-O(4)#11                       | 2.796(13) |
| Li(3)-O(2)                                                        | 1.96(2)   | O(1)-Na(1)#6                        | 2.535(4)  |
| Li(4)-O(2)                                                        | 2.02(5)   | O(4)-Na(1)#13                       | 2.796(13) |
| Li(1)-O(2)                                                        | 2.19(3)   |                                     |           |
| Li(3)#4-O(2)                                                      | 2.237(19) | O(3)-P(1)-O(1)                      | 113.9(2)  |
| Li(2)-O(3)                                                        | 1.868(17) | O(3)-P(1)-O(2)                      | 107.5(2)  |
| Li(1)#1-O(3)                                                      | 1.91(3)   | O(1)-P(1)-O(2)                      | 112.2(2)  |
| Li(5)-O(3)                                                        | 1.96(4)   | O(3)-P(1)-O(4)                      | 99.1(6)   |
| Li(2)#3-O(3)                                                      | 2.277(17) | O(1)-P(1)-O(4)                      | 109.6(5)  |
| Li(1)-O(4)                                                        | 2.17(4)   | O(2)-P(1)-O(4)                      | 113.9(5)  |
| Li(4)#4-O(4)                                                      | 2.61(5)   | O(3)#1-Al(1)-O(3)#2                 | 89.9(3)   |
| Li(4)#5-O(5)                                                      | 1.92(6)   | O(3)#1-Al(1)-O(2)#3                 | 179.0(2)  |
| Li(3)#5-O(5)                                                      | 2.16(3)   | O(3)#2-Al(1)-O(2)#3                 | 89.1(2)   |
| Li(5)#5-O(6)                                                      | 1.85(5)   | O(3)#1-Al(1)-O(2)#4                 | 89.1(2)   |
| Li(2)#5-O(6)                                                      | 2.10(3)   | O(3)#2-Al(1)-O(2)#4                 | 179.0(2)  |
| Li(1)#6-O(6)                                                      | 2.15(3)   | O(2)#3-Al(1)-O(2)#4                 | 91.8(2)   |
| Li(2)-O(7)                                                        | 1.87(3)   | O(3)#1-Al(1)-O(1)                   | 89.74(18) |
| Li(5)-O(7)                                                        | 2.21(6)   | O(3)#2-Al(1)-O(1)                   | 93.28(18) |
| Li(3)-O(8)                                                        | 1.84(3)   | O(2)#3-Al(1)-O(1)                   | 90.37(16) |
| Li(1)#9-O(8)                                                      | 2.07(3)   | O(2)#4-Al(1)-O(1)                   | 86.66(15) |
| Li(4)-O(8)                                                        | 2.19(7)   | O(3)#1-Al(1)-O(1)#5                 | 93.28(18) |
| Li(4)#6-O(9)                                                      | 1.93(6)   | O(3)#2-Al(1)-O(1)#5                 | 89.74(18) |
| Li(4)#4-O(9)                                                      | 2.00(5)   | O(2)#3-Al(1)-O(1)#5                 | 86.66(15) |
| Li(5)#7-O(10)                                                     | 1.97(4)   | O(2)#4-Al(1)-O(1)#5                 | 90.37(16) |
| Li(5)#8-O(10)                                                     | 2.02(3)   | O(1)-Al(1)-O(1)#5                   | 175.7(2)  |
| Li(3)-O(12)                                                       | 2.66(6)   |                                     |           |
| Li(2)#6-OW1                                                       | 2.02(2)   |                                     |           |
| Li(2)#12-OW1                                                      | 2.02(2)   |                                     |           |
| Li(2)#3-OW1                                                       | 2.02(2)   |                                     |           |
| Li(2)-OW1                                                         | 2.02(2)   |                                     |           |
| Li(3)#13-OW2                                                      | 2.00(3)   |                                     |           |
| Li(3)#9-OW2                                                       | 2.00(3)   |                                     |           |
| Li(3)#4-OW2                                                       | 2.00(3)   |                                     |           |
| Li(3)-OW2                                                         | 2.00(3)   |                                     |           |
|                                                                   |           |                                     |           |
| O(2)-Al(1)-O(3)                                                   | 178.5(4)  |                                     |           |
| O(2)-Al(1)-O(1)#1                                                 | 94.7(3)   |                                     |           |
| O(3)-Al(1)-O(1)#1                                                 | 86.6(4)   |                                     |           |
| O(2)-Al(1)-O(5)#2                                                 | 87.8(4)   |                                     |           |
| O(3)-Al(1)-O(5)#2                                                 | 91.4(4)   |                                     |           |
| O(1)#1-Al(1)-O(5)#2                                               | 90.0(4)   |                                     |           |
| O(2)-Al(1)-O(4)                                                   | 86.0(4)   |                                     |           |
| O(3)-Al(1)-O(4)                                                   | 92.7(3)   |                                     |           |

|                     |           |  |  |
|---------------------|-----------|--|--|
| O(1)#1-Al(1)-O(4)   | 179.2(5)  |  |  |
| O(5)#2-Al(1)-O(4)   | 89.5(4)   |  |  |
| O(2)-Al(1)-O(7)#3   | 92.7(4)   |  |  |
| O(3)-Al(1)-O(7)#3   | 88.1(4)   |  |  |
| O(1)#1-Al(1)-O(7)#3 | 89.3(4)   |  |  |
| O(5)#2-Al(1)-O(7)#3 | 179.2(7)  |  |  |
| O(4)-Al(1)-O(7)#3   | 91.2(4)   |  |  |
| O(6)-P(1A)-O(4)     | 113.3(6)  |  |  |
| O(6)-P(1A)-O(7)     | 114.9(4)  |  |  |
| O(4)-P(1A)-O(7)     | 110.5(7)  |  |  |
| O(6)-P(1A)-O(9)     | 106.9(13) |  |  |
| O(4)-P(1A)-O(9)     | 104.2(7)  |  |  |
| O(7)-P(1A)-O(9)     | 106.2(11) |  |  |
| O(6)-P(1A)-O(11)    | 77.8(19)  |  |  |
| O(4)-P(1A)-O(11)    | 79(3)     |  |  |
| O(7)-P(1A)-O(11)    | 66(2)     |  |  |
| O(9)-P(1A)-O(11)    | 172(2)    |  |  |
| O(11)-P(1B)-O(4)    | 112(5)    |  |  |
| O(11)-P(1B)-O(6)    | 110(3)    |  |  |
| O(4)-P(1B)-O(6)     | 116.5(9)  |  |  |
| O(11)-P(1B)-O(7)    | 90(3)     |  |  |
| O(4)-P(1B)-O(7)     | 110.6(8)  |  |  |
| O(6)-P(1B)-O(7)     | 114.5(5)  |  |  |
| O(8)-P(2A)-O(1)     | 112.6(6)  |  |  |
| O(8)-P(2A)-O(5)     | 114.1(4)  |  |  |
| O(1)-P(2A)-O(5)     | 111.2(6)  |  |  |
| O(8)-P(2A)-O(10)    | 109.3(9)  |  |  |
| O(1)-P(2A)-O(10)    | 103.4(6)  |  |  |
| O(5)-P(2A)-O(10)    | 105.5(9)  |  |  |
| O(8)-P(2A)-O(12)    | 64(2)     |  |  |
| O(1)-P(2A)-O(12)    | 80(4)     |  |  |
| O(5)-P(2A)-O(12)    | 78(2)     |  |  |
| O(10)-P(2A)-O(12)   | 173(2)    |  |  |
| O(12)-P(2B)-O(1)    | 116(6)    |  |  |
| O(12)-P(2B)-O(8)    | 89(3)     |  |  |
| O(1)-P(2B)-O(8)     | 112.9(7)  |  |  |
| O(12)-P(2B)-O(5)    | 111(4)    |  |  |
| O(1)-P(2B)-O(5)     | 112.9(7)  |  |  |
| O(8)-P(2B)-O(5)     | 113.0(4)  |  |  |

Li<sub>3</sub>[Al(PO<sub>4</sub>)<sub>2</sub>(H<sub>2</sub>O)<sub>1.5</sub>]. Symmetry transformations used to generate equivalent atoms: #1 x, y, z-1; #2 -y+1, x, z-1; #3 -y+1, x-1, z; #4 -y+1, x, z; #5 x, y, z+1; #6 y+1, -x+1, z; #7 y, -x+1, z+1; #8 -y+1, x-1, z+1; #9 y, -x+1, z; #10 -x+2, -y+1, z; #11 -x+1, -y, z; #12 -x+2, -y, z; #13 -x+1, -y+1, z.

Na[AlP<sub>2</sub>O<sub>7</sub>]. Symmetry transformations used to generate equivalent atoms: #1-x, -y, -z+1; #2x, -y, z-1/2; #3 -x+1/2, -y+1/2, -z+1; #4 x-1/2, -y+1/2, z-1/2; #5-x, y, -z+1/2; #6-x, y, -z+3/2; #7 x, y, z-1; #8-x+1/2, -y+1/2, -z+2; #9 x+1/2, -y+1/2, z+1/2; #10 x, -y, z+1/2; #11 -x+1/2, y+1/2, -z+3/2; #12 x, y, z+1; #13 -x+1/2, y-1/2, -z+3/2.

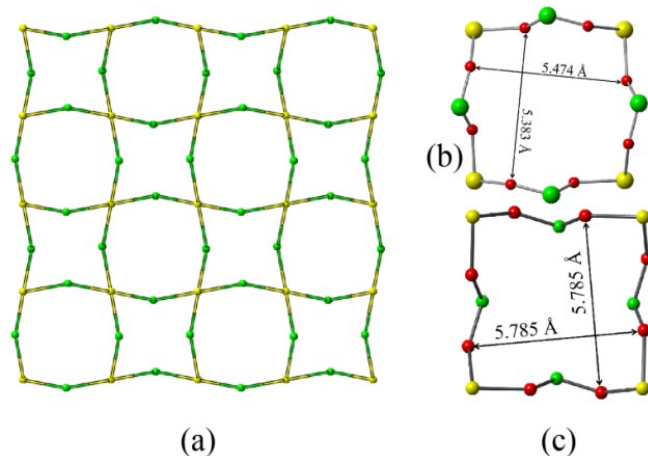

**Figure S4:** (a) The simplified cationic 2D Layer of  $\text{Li}_3[\text{Al}(\text{PO}_4)_2(\text{H}_2\text{O})_{1.5}]$  along the  $c$ -axis (a); two 8-MRs along the  $c$ -axis with a size of  $\sim 5.474 \text{ \AA} \times 5.383 \text{ \AA}$  (b), and  $\sim 5.785 \text{ \AA} \times 5.785 \text{ \AA}$  (c). Al nodes, P nodes and O atoms are shown as yellow, green and red, respectively.

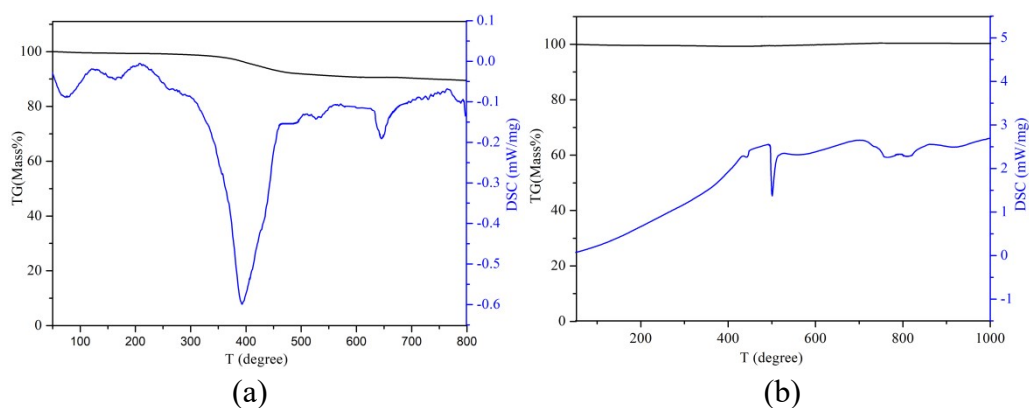

**Figure S5:** TG-DSC curves of  $\text{Li}_3[\text{Al}(\text{PO}_4)_2(\text{H}_2\text{O})_{1.5}]$  (a) and  $\text{Na}[\text{AlP}_2\text{O}_7]$  (b).

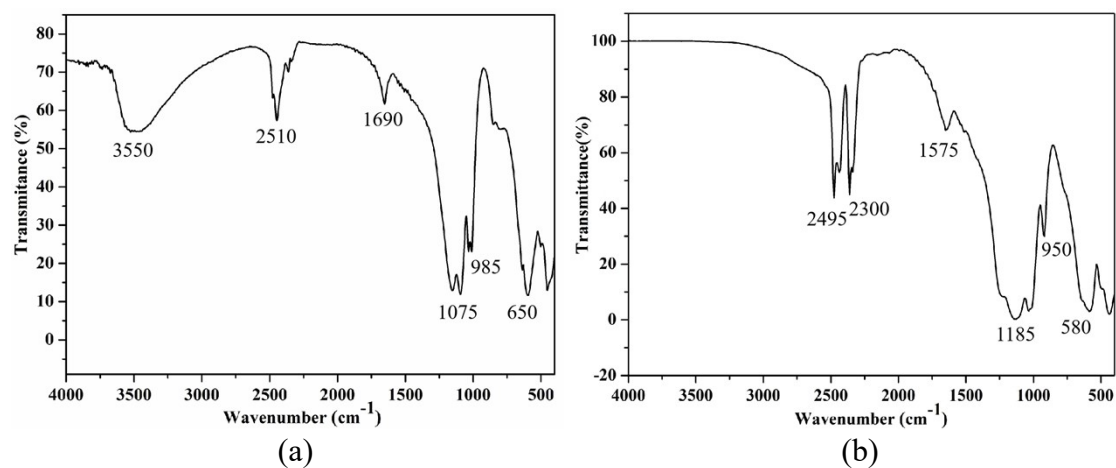

**Figure S6:** IR spectra of  $\text{Li}_3[\text{Al}(\text{PO}_4)_2(\text{H}_2\text{O})_{1.5}]$  (a) and  $\text{Na}[\text{AlP}_2\text{O}_7]$  (b).
